# Supplementary material for: Streptopyridines, volatile pyridine alkaloids produced by Streptomyces sp. FORM5
Source: PubMed Central journal article supplement (PMC4077424; doi:10.3762/bjoc.10.146), 2014-06-24
Supplement: Beilstein_J_Org_Chem-10-1421-s001.pdf [file Beilstein_J_Org_Chem-10-1421-s001.pdf]

# Supporting Information

for

## Streptopyridines, volatile pyridine alkaloids produced by *Streptomyces* sp. FORM5

Ulrike Groenhagen<sup>1</sup>, Michael Maczka<sup>1</sup>, Jeroen S. Dickschat<sup>1</sup> and Stefan Schulz<sup>1,\*</sup>

Address: <sup>1</sup>Institut für Organische Chemie, Technische Universität Braunschweig, Hagenring 30, 38106  
Braunschweig, Germany

Email: Stefan Schulz\* - stefan.schulz@tu-braunschweig.de

\*Corresponding author

**Total ion chromatograms of strain *Streptomyces* sp. FORM5, mass spectra,  
16S-RNA data, and <sup>1</sup>H and <sup>13</sup>C NMR spectra of the synthetic compounds**

## Streptomyces sp. FORM5, 16S-Sequenz

GACTTCGTCCCAATCGCCAGTCCCACCTTCGACAGCTCCCTCCCGCGAACGGGTGGGCCACCGGCTT  
 CGGGTGTACCGACTTTCGTGACGTGACGGGCGGTGTGTACAAGGCCCGGGAACGTATTCACCGCAGC  
 AATGCTGATCTGCGATTACTAGCGACTCCGACTTCATGGGGTCGAGTTGCAGACCCCAATCCGAACTG  
 AGACCGGCTTTTTGAGATTCGCTCCACCTCACGGTATCGCAGCTCATTGTACCGGCCATTGTAGCACG  
 TGTGCAGCCCAAGACATAAGGGGCATGATGACTTGACGTTCGTCACCTTCCCTCCGAGTTGACCCCG  
 GCGGTCTCCCGTGAGTCCCAGCACCACAAGGGCCTGCTGGCAACACGGGACAAGGGTTGCGCTCGTT  
 GCGGGACTTAACCCAACATCTCACGACACGAGCTGACGACAGCCATGCACCACCTGTACACCGACCAC  
 AAGGGGGCGCCCATCTCTGGACGTTTCCGGTGTATGTCAAGCCTTGGTAAGGTTCTTCGCGTTGCGTC  
 GAATTAAGCCACATGCTCCGCCGCTTGTGCGGGCCCCCGTCAATTCTTTGAGTTTGTAGCCTTGC  
 CGTACTCCCAGGCGGGGCACTTAATGCGTTAGCTGCGGCACGGACAACGTGGAATGTTGCCACACC  
 TAGTGCCACCGTTTACGGCGTGGACTACCAGGGTATCTAATCCTGTTCGCTCCCCACGCTTTCGCTC  
 CTCAGCGTCAGTATCGGCCAGAGATCCGCCTTCGCCACCGGTGTTCCCTCCTGATATCTGCGCATTT  
 ACCGCTACACCAGGAATTCGGATCTCCCCTACCGAACTCTAGCCTGCCCGTATCGACTGCAGACCCGG  
 GGTTAAGCCCCGGGCTTTCACAACCGACGTGACAAGCCGCCTACGAGCTCTTTACGCCCAATAATTCC  
 GGACAACGCTTGCGCCCTACGTATTACCGCGGCTGCTGGCACGTAGTTAGCCGGCGCTTCTTCTGCAG  
 GTACCGTCACTTTCGCTTCTCCCTGCTGAAAGAGGTTTACAACCCGAAGGCCGTATCCCTCACGCG  
 GCGTTCGCTGCATCAGGCTTTCGCCATTGTGCAATATTCCCCTACTGCTGCCTCCCGTAGGAGTCTGGG  
 CCGTGTCTCAGTCCCAGTGTGGCCGGTCGCCCTCTCAGGCCGGCTACCCGTGCTCGCCTTGGTGAGCC  
 GTTACCTCACCAACAAGCTGATAGGCCGCGGGCTCATCCTGCACCGCCGGAGCTTTACAGAACCAAGG  
 ATGCCAAGGCTCTCATATCCGGTATTAGACCCCGTTTCCAGGGCTTGTCCCAGAGTGCAGGGCGAGT  
 TGCCACGTGTTACTCACCCGTTTCGCCACTAATCCCACCGAAGTGGTTCATCGTTTCGACTGCATGTG  
 TTAAGCACGCCGCCAGCGTTCGTCT

## Sequence alignment results

Sequences producing significant alignments:

| Accession                  | Description                                                                                | Max score | Total score | Query coverage | E value | Max ident |
|----------------------------|--------------------------------------------------------------------------------------------|-----------|-------------|----------------|---------|-----------|
| <a href="#">AB184419.1</a> | Streptomyces griseosporus gene for 16S rRNA, partial sequence, strain: NBR                 | 2606      | 2606        | 99%            | 0.0     | 99%       |
| <a href="#">AB184361.2</a> | Streptomyces viridis gene for 16S rRNA, partial sequence, strain: NBR                      | 2599      | 2599        | 99%            | 0.0     | 98%       |
| <a href="#">GQ214030.1</a> | Streptomyces sp. ZG0650 16S ribosomal RNA gene, partial sequence                           | 2593      | 2593        | 99%            | 0.0     | 98%       |
| <a href="#">GU130108.1</a> | Streptomyces sp. 172618 16S ribosomal RNA gene, partial sequence                           | 2582      | 2582        | 99%            | 0.0     | 98%       |
| <a href="#">GQ214028.1</a> | Streptomyces sp. ZG0737 16S ribosomal RNA gene, partial sequence                           | 2582      | 2582        | 99%            | 0.0     | 98%       |
| <a href="#">AB184648.1</a> | Streptomyces cinereospinus gene for 16S rRNA, partial sequence, strain: NBR                | 2580      | 2580        | 99%            | 0.0     | 98%       |
| <a href="#">AB184849.1</a> | Streptomyces coeruleorubidus gene for 16S rRNA, partial sequence, strain: NBR              | 2577      | 2577        | 99%            | 0.0     | 98%       |
| <a href="#">GQ924534.1</a> | Streptomyces sp. ACT-0094 16S ribosomal RNA gene, partial sequence                         | 2571      | 2571        | 99%            | 0.0     | 98%       |
| <a href="#">FJ429553.1</a> | Uncultured Streptomyces sp. clone 2440 16S ribosomal RNA gene, partial sequence            | 2571      | 2571        | 99%            | 0.0     | 98%       |
| <a href="#">EF063473.1</a> | Streptomyces sp. 558(1) 16S ribosomal RNA gene, partial sequence                           | 2571      | 2571        | 99%            | 0.0     | 98%       |
| <a href="#">AB184584.1</a> | Streptomyces thermocoerulescens gene for 16S rRNA, partial sequence, strain: NBR           | 2571      | 2571        | 99%            | 0.0     | 98%       |
| <a href="#">AB184877.1</a> | Streptomyces iakyrus gene for 16S rRNA, partial sequence, strain: NBR                      | 2569      | 2569        | 99%            | 0.0     | 98%       |
| <a href="#">AB184504.1</a> | Streptomyces kagoshimanus gene for 16S rRNA, partial sequence, strain: NBR                 | 2569      | 2569        | 99%            | 0.0     | 98%       |
| <a href="#">AY999873.1</a> | Streptomyces griseosporus strain AS 4.1840 16S ribosomal RNA gene, partial sequence        | 2567      | 2567        | 99%            | 0.0     | 99%       |
| <a href="#">FJ429558.1</a> | Uncultured Streptomyces sp. clone 2509 16S ribosomal RNA gene, partial sequence            | 2566      | 2566        | 99%            | 0.0     | 98%       |
| <a href="#">EU741215.1</a> | Streptomyces iakyrus strain 13667L 16S ribosomal RNA gene, partial sequence                | 2564      | 2564        | 99%            | 0.0     | 98%       |
| <a href="#">EF056498.1</a> | Streptomyces sp. 1A01629 16S ribosomal RNA gene, complete sequence                         | 2564      | 2564        | 99%            | 0.0     | 98%       |
| <a href="#">AB184326.1</a> | Streptomyces parvulus gene for 16S rRNA, partial sequence, strain: NBR                     | 2564      | 2564        | 99%            | 0.0     | 98%       |
| <a href="#">EF063493.1</a> | Streptomyces sp. P3562 16S ribosomal RNA gene, partial sequence                            | 2562      | 2562        | 99%            | 0.0     | 98%       |
| <a href="#">AJ781382.1</a> | Streptomyces purpurascens 16S rRNA gene, type strain LMG 20526                             | 2562      | 2562        | 99%            | 0.0     | 98%       |
| <a href="#">HM367877.1</a> | Streptomyces sp. Ank289 16S ribosomal RNA gene, partial sequence                           | 2560      | 2560        | 99%            | 0.0     | 98%       |
| <a href="#">GU433228.1</a> | Streptomyces sp. ABRIINW 111 16S ribosomal RNA gene, complete sequence                     | 2560      | 2560        | 99%            | 0.0     | 98%       |
| <a href="#">GQ925802.1</a> | Streptomyces albobrisesolus strain ABRIINW EA1145 16S ribosomal RNA gene, partial sequence | 2560      | 2560        | 99%            | 0.0     | 98%       |
| <a href="#">DQ663193.1</a> | Streptomyces sp. 3176 16S ribosomal RNA gene, partial sequence                             | 2560      | 2560        | 99%            | 0.0     | 98%       |
| <a href="#">AB249954.1</a> | Streptomyces malachitospinus gene for 16S rRNA, partial sequence, strain: NBR              | 2560      | 2560        | 99%            | 0.0     | 98%       |
| <a href="#">AB045888.1</a> | Streptomyces purpurascens gene for 16S rRNA                                                | 2560      | 2560        | 99%            | 0.0     | 98%       |
| <a href="#">AB045865.1</a> | Streptomyces heteromorphus gene for 16S rRNA                                               | 2560      | 2560        | 99%            | 0.0     | 98%       |
| <a href="#">FJ626660.1</a> | Streptomyces sp. MH105 16S ribosomal RNA gene, partial sequence                            | 2558      | 2558        | 99%            | 0.0     | 98%       |
| <a href="#">EF012113.1</a> | Streptomyces sp. 1A01536 16S ribosomal RNA gene, partial sequence                          | 2558      | 2558        | 99%            | 0.0     | 98%       |
| <a href="#">AB184859.1</a> | Streptomyces purpurascens gene for 16S rRNA, partial sequence, strain: NBR                 | 2558      | 2558        | 99%            | 0.0     | 98%       |

These data were provided by R. Müller (pers. commun.). The data were obtained with the method described in: Raju, R., Gromyko, O., Fedorenko, V., Luzhetskyy, A. and Müller, R., Oleaceran: A novel spiro[isobenzofuran-1,2'-naphtho[1,8-bcfuran] isolated from a terrestrial *Streptomyces* sp, *Org. Lett.* **2013**, *15*, 3487–3489.

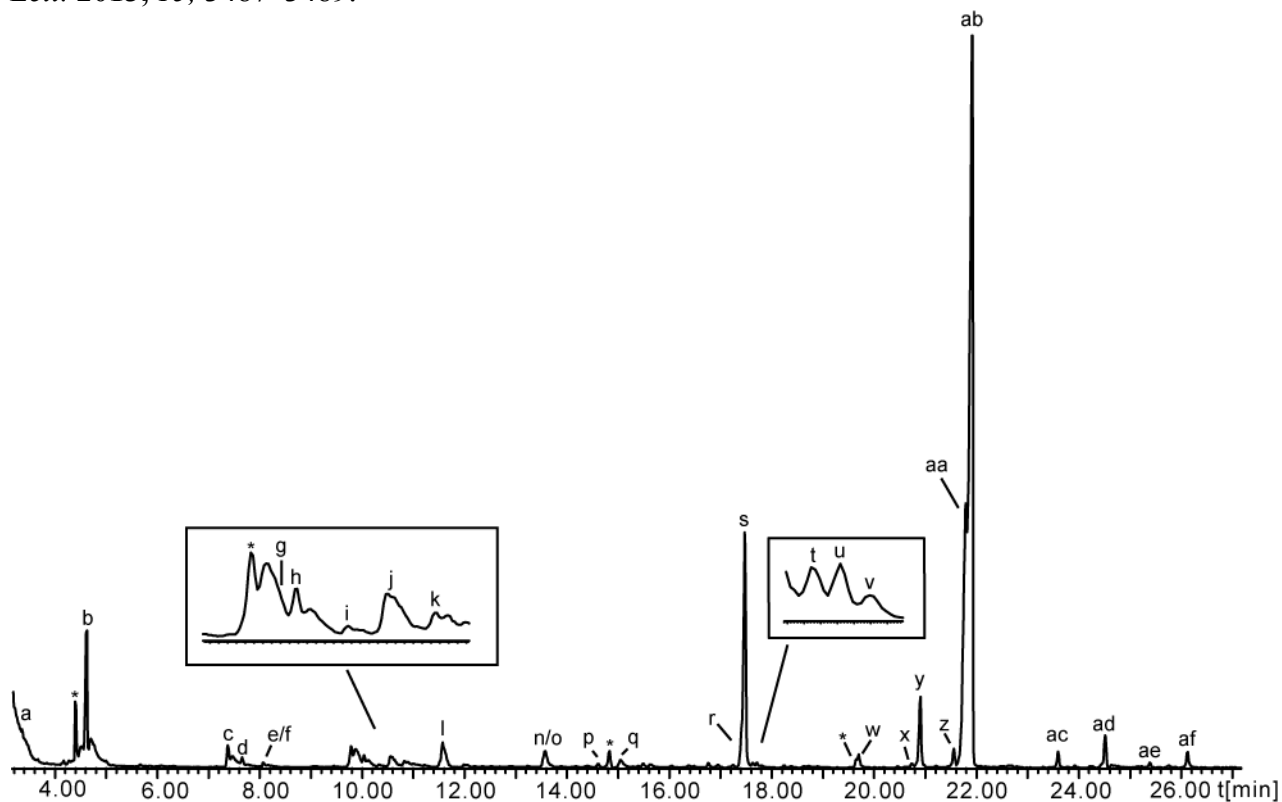

**Figure S1:** Total ion chromatogram of the headspace extract of *Streptomyces* sp. FORM5. Nomination refers to Table 1. Artifacts are marked with \*.

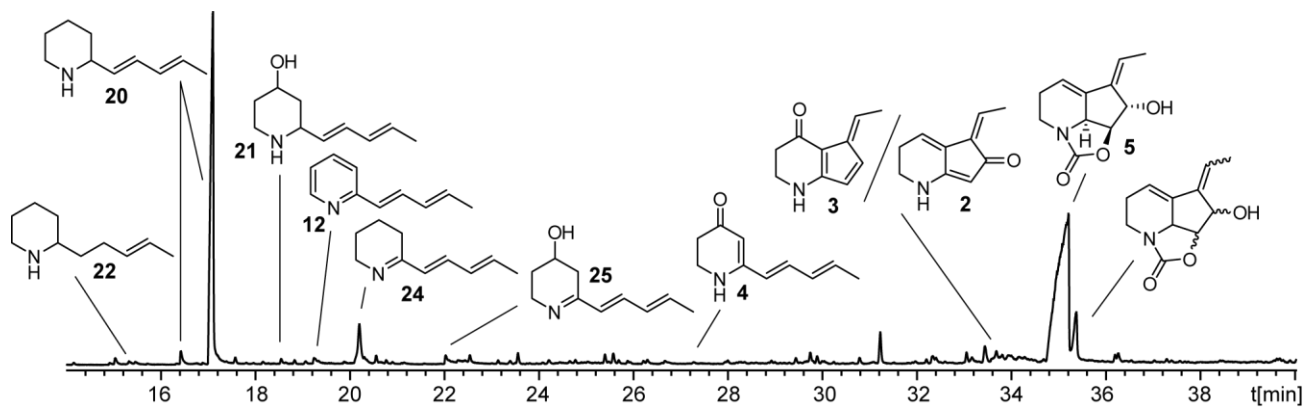

**Figure S2:** Total ion chromatogram of the O-extract of *Streptomyces* sp. FORM5.

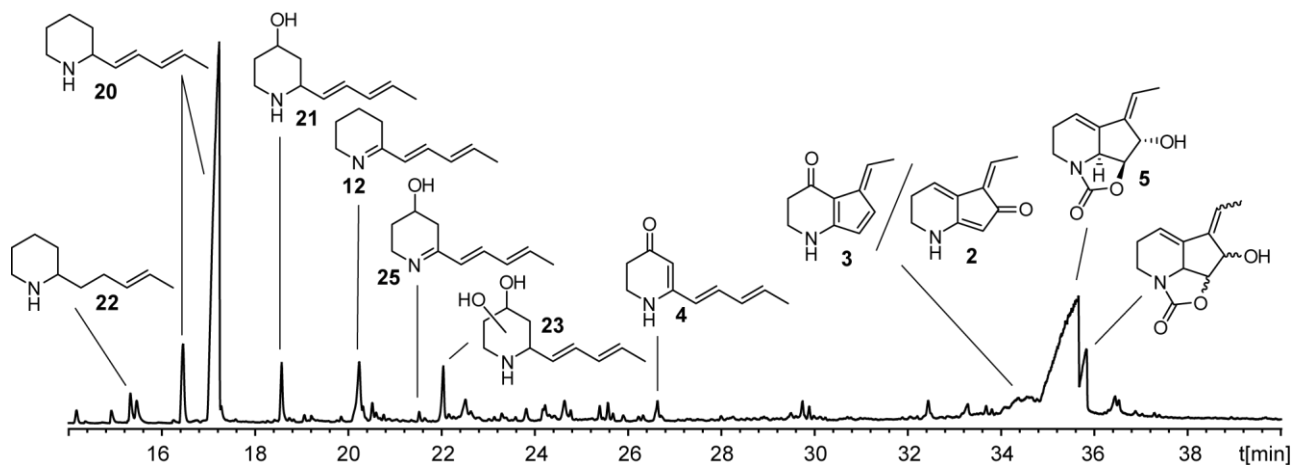

**Figure S3:** Total ion chromatogram of the E-extract of *Streptomyces* sp. FORM5.

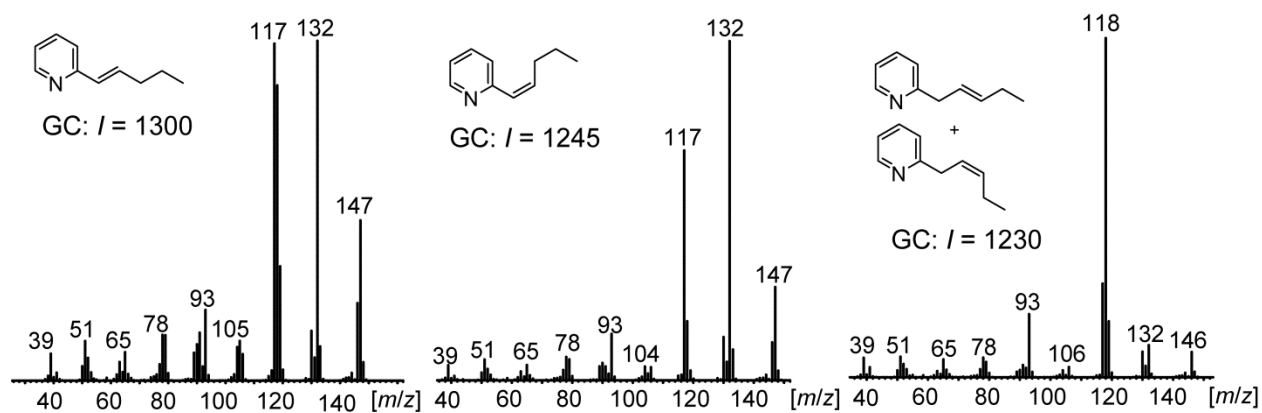

**Figure S4:** EI-Mass spectra of synthetic 2-pentenylpiperidines. *I*: retention index.

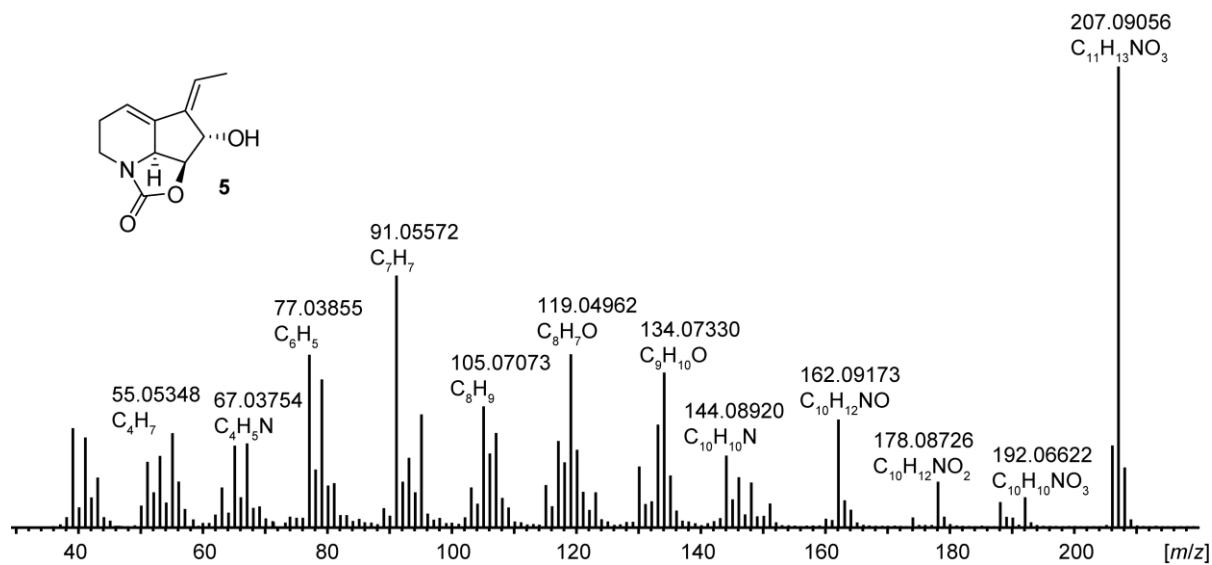

**Figure S5:** EI-Mass spectrum of streptazolin and high resolution MS data.

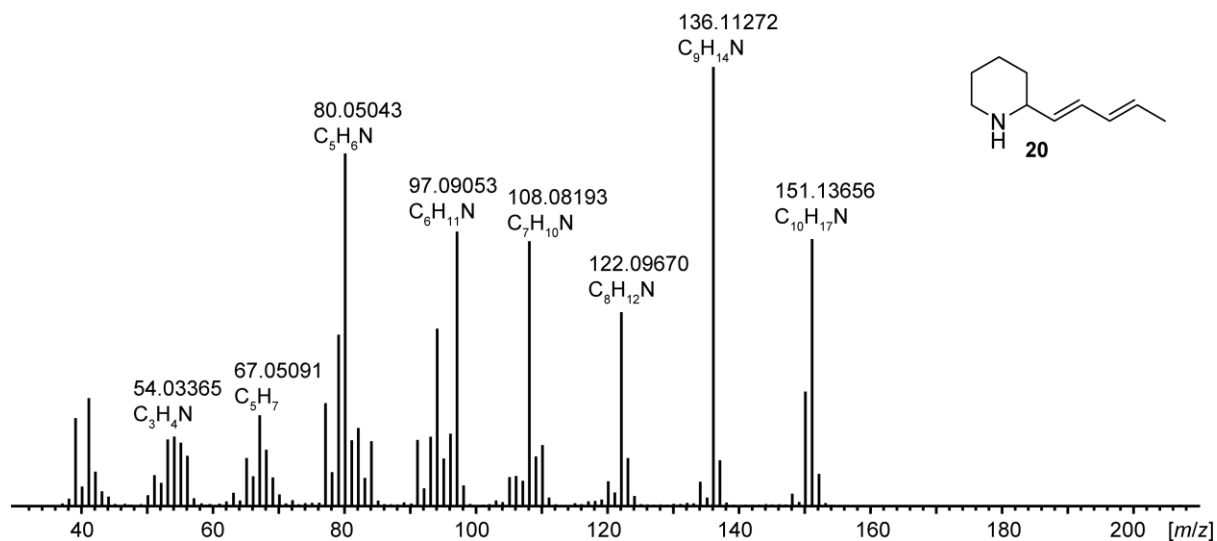

**Figure S6:** EI-Mass spectrum and high resolution MS data of 2-(1E,3E)-1,3-pentadienyl)piperidine (20).

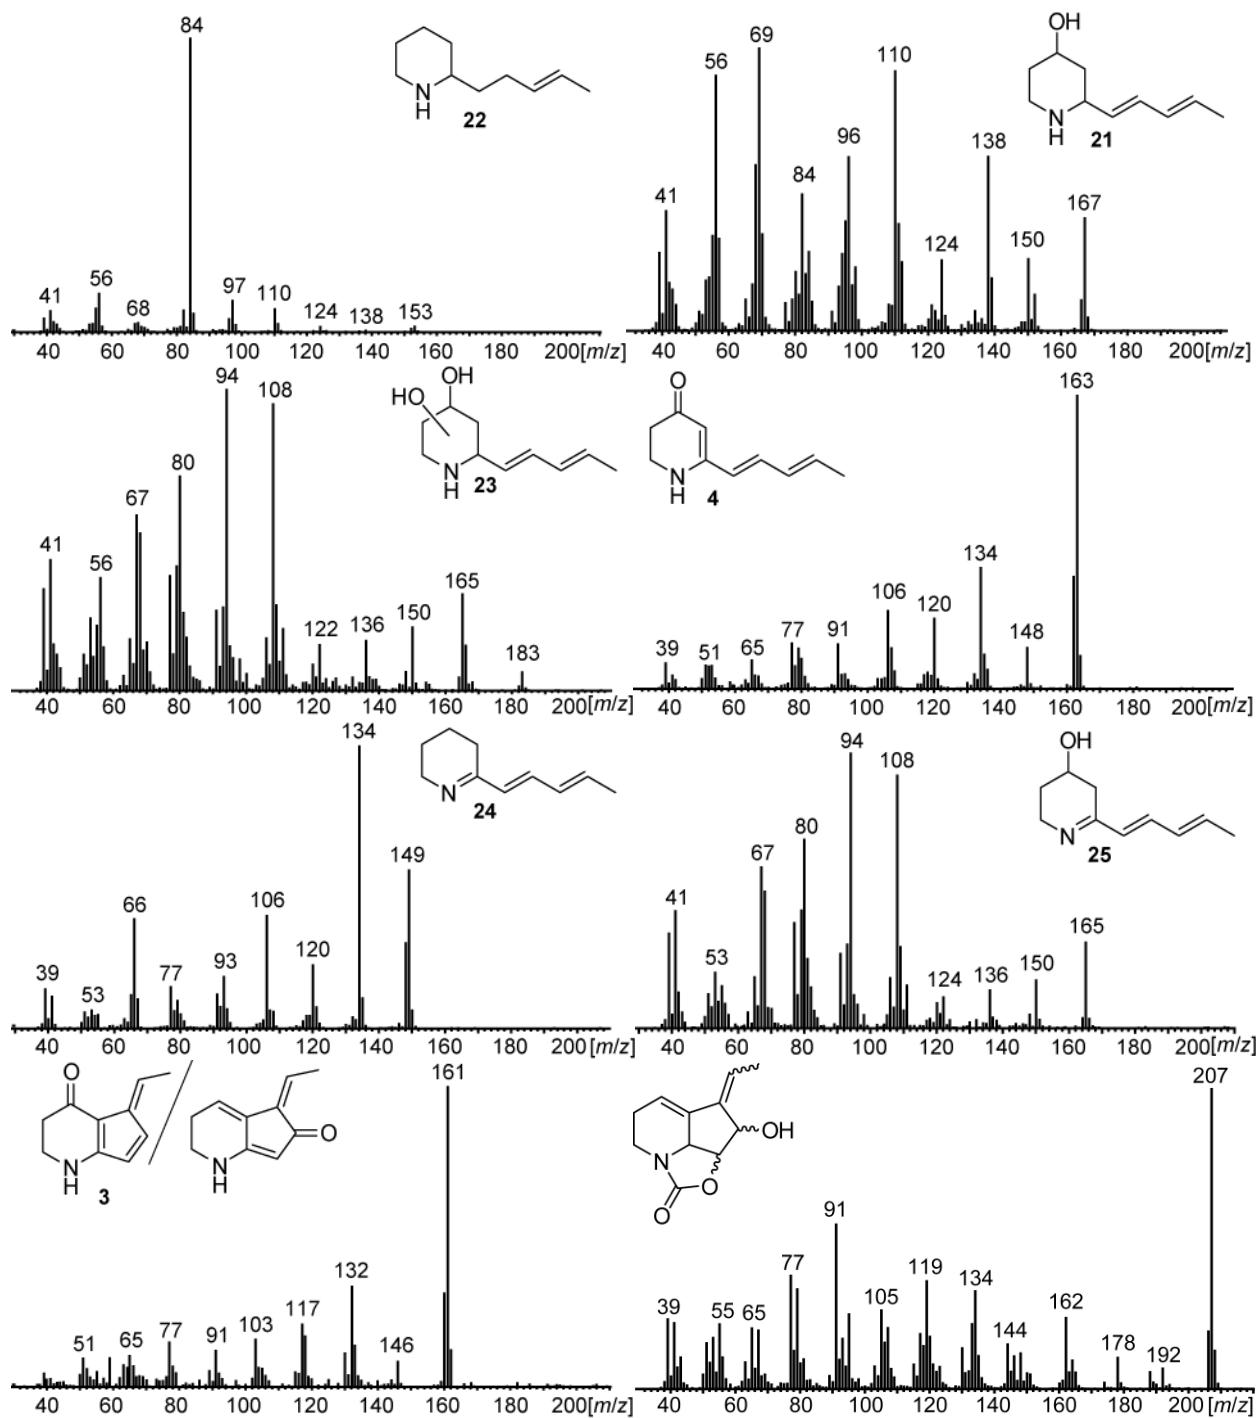

**Figure S7:** EI-Mass spectra of piperidine derivatives and a streptazolin stereoisomer. The structures are tentatively assigned basing on the discussion in the main text.

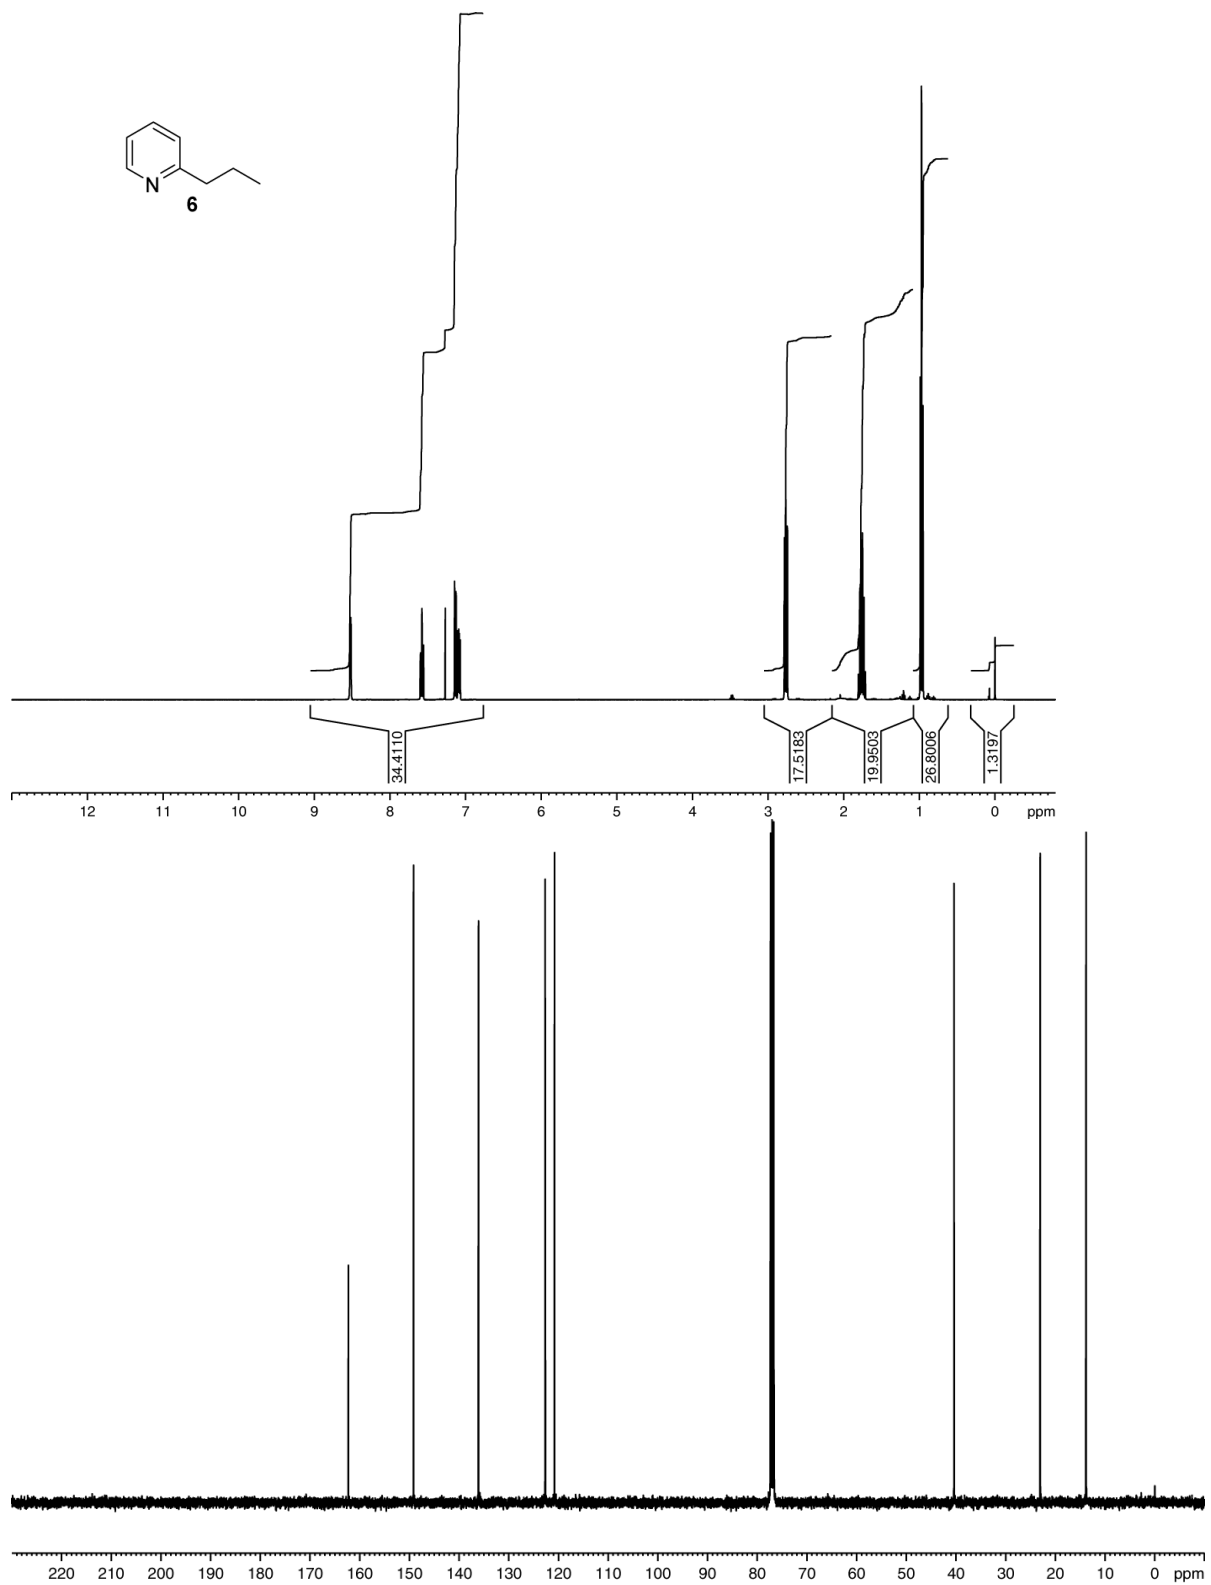

**Figure S8:**  $^1\text{H}$  NMR ( $\text{CDCl}_3$ , 400 MHz) and  $^{13}\text{C}$  NMR ( $\text{CDCl}_3$ , 100 MHz) spectrum of compound **6**.

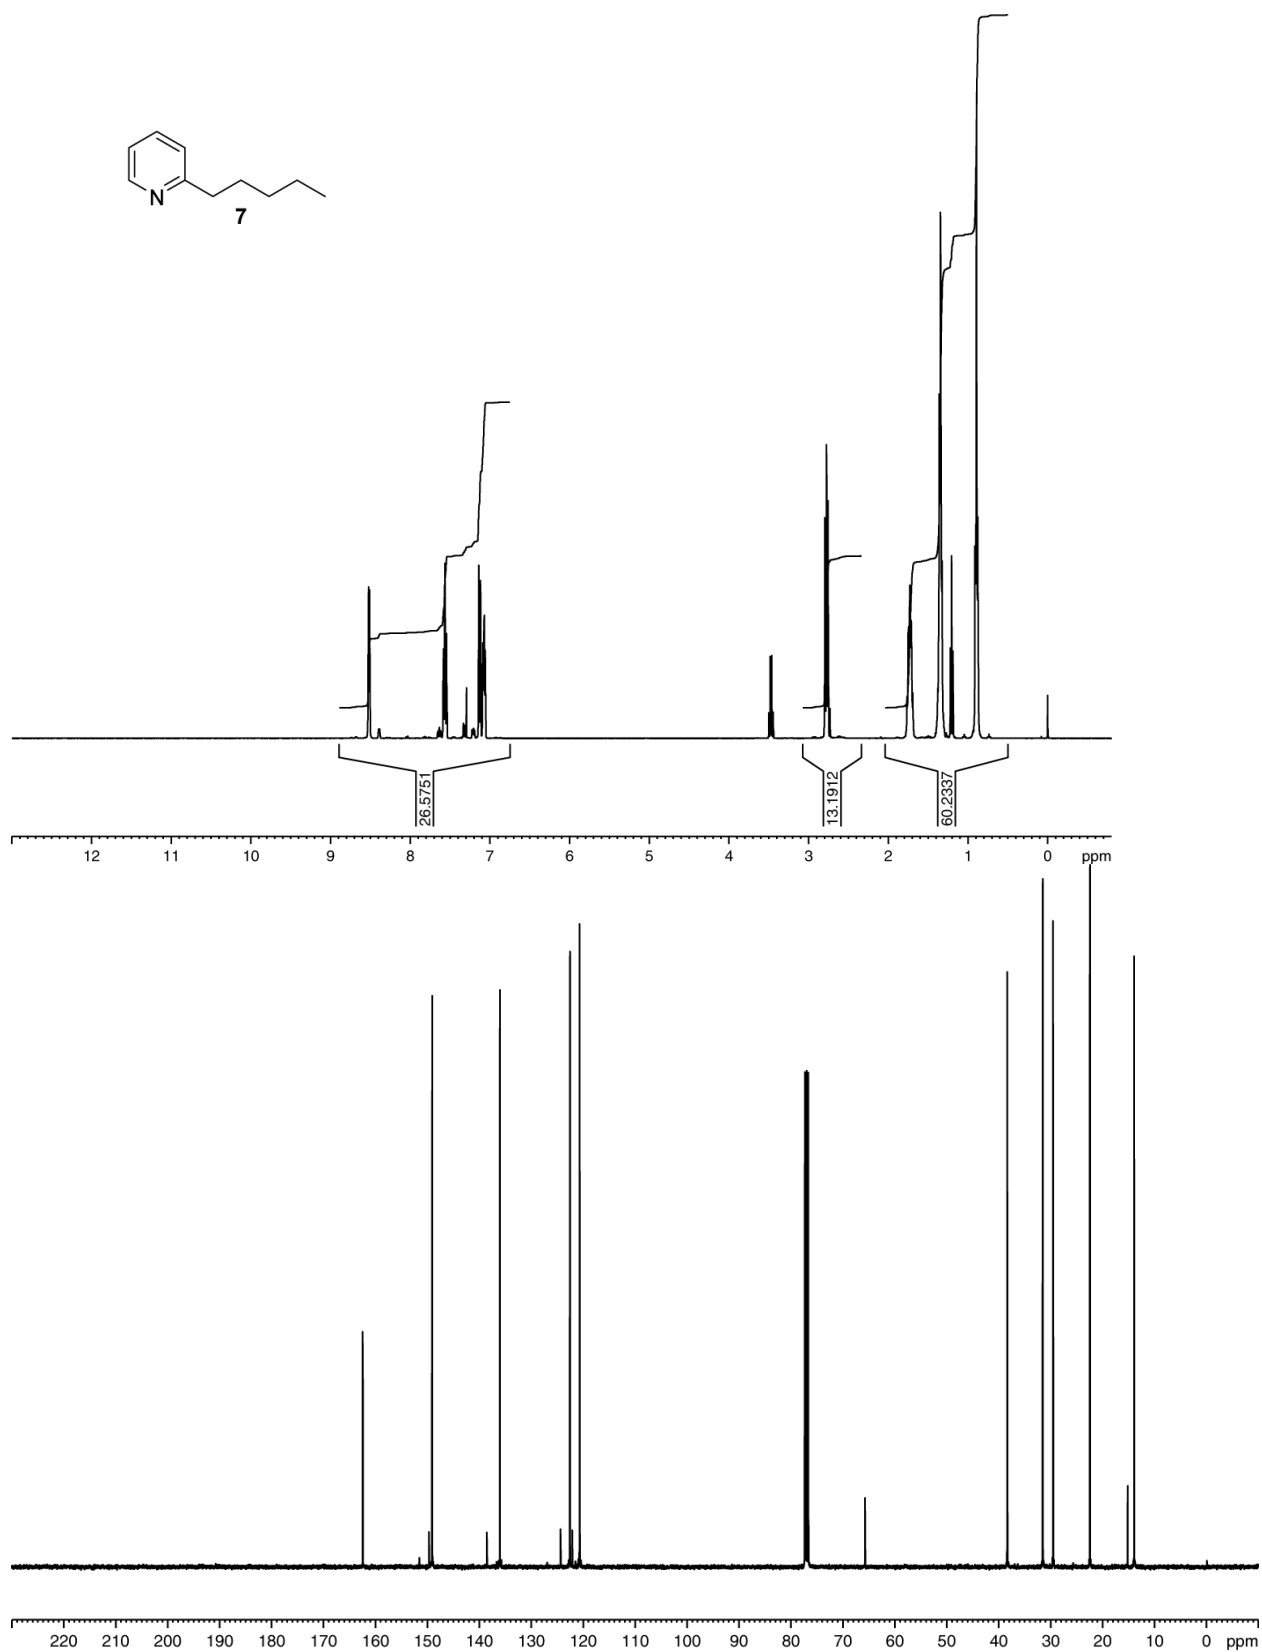

**Figure S9:** <sup>1</sup>H NMR (CDCl<sub>3</sub>, 400 MHz) and <sup>13</sup>C NMR (CDCl<sub>3</sub>, 100 MHz) spectrum of compound 7.



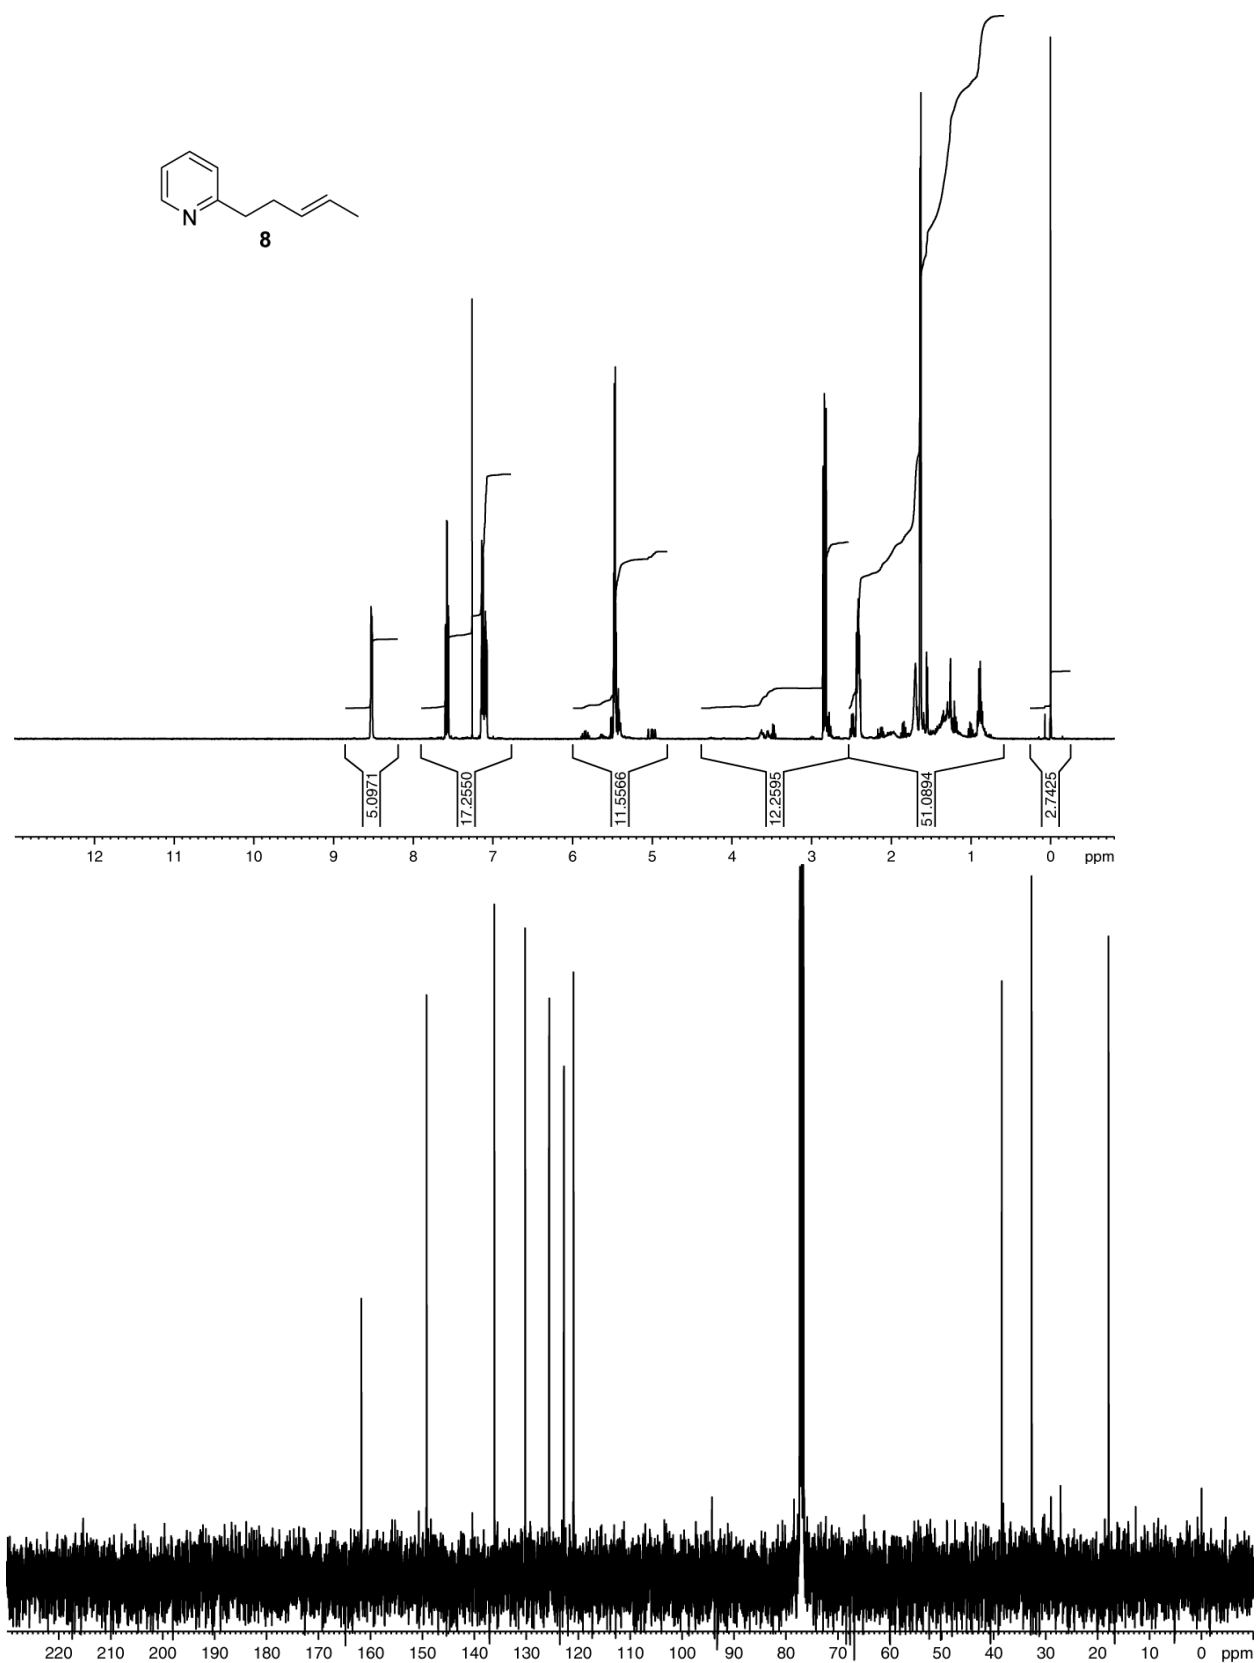

**Figure S10:**  $^1\text{H}$  NMR ( $\text{CDCl}_3$ , 400 MHz) and  $^{13}\text{C}$  NMR ( $\text{CDCl}_3$ , 100 MHz) spectrum of compound **8**.

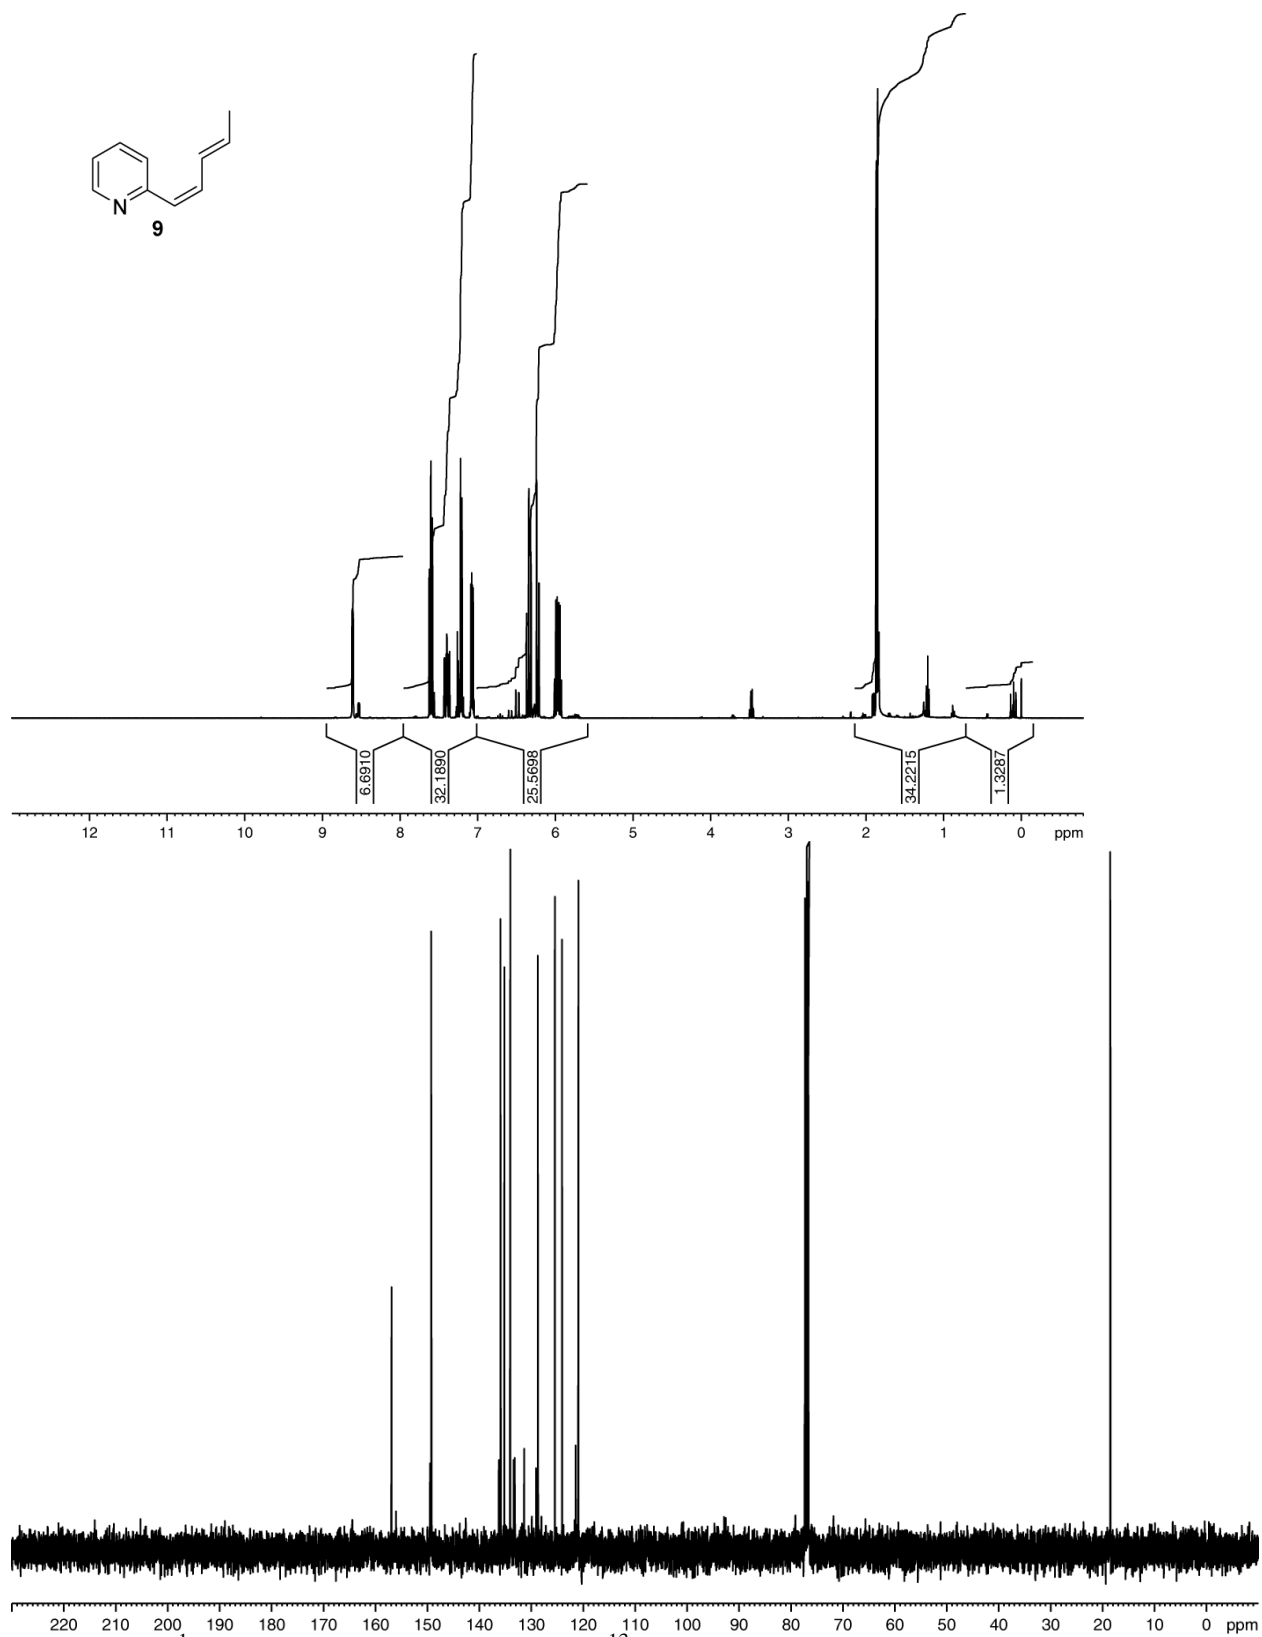

**Figure S11:**  $^1\text{H}$  NMR ( $\text{CDCl}_3$ , 400 MHz) and  $^{13}\text{C}$  NMR ( $\text{CDCl}_3$ , 100 MHz) spectrum of compound **9**.

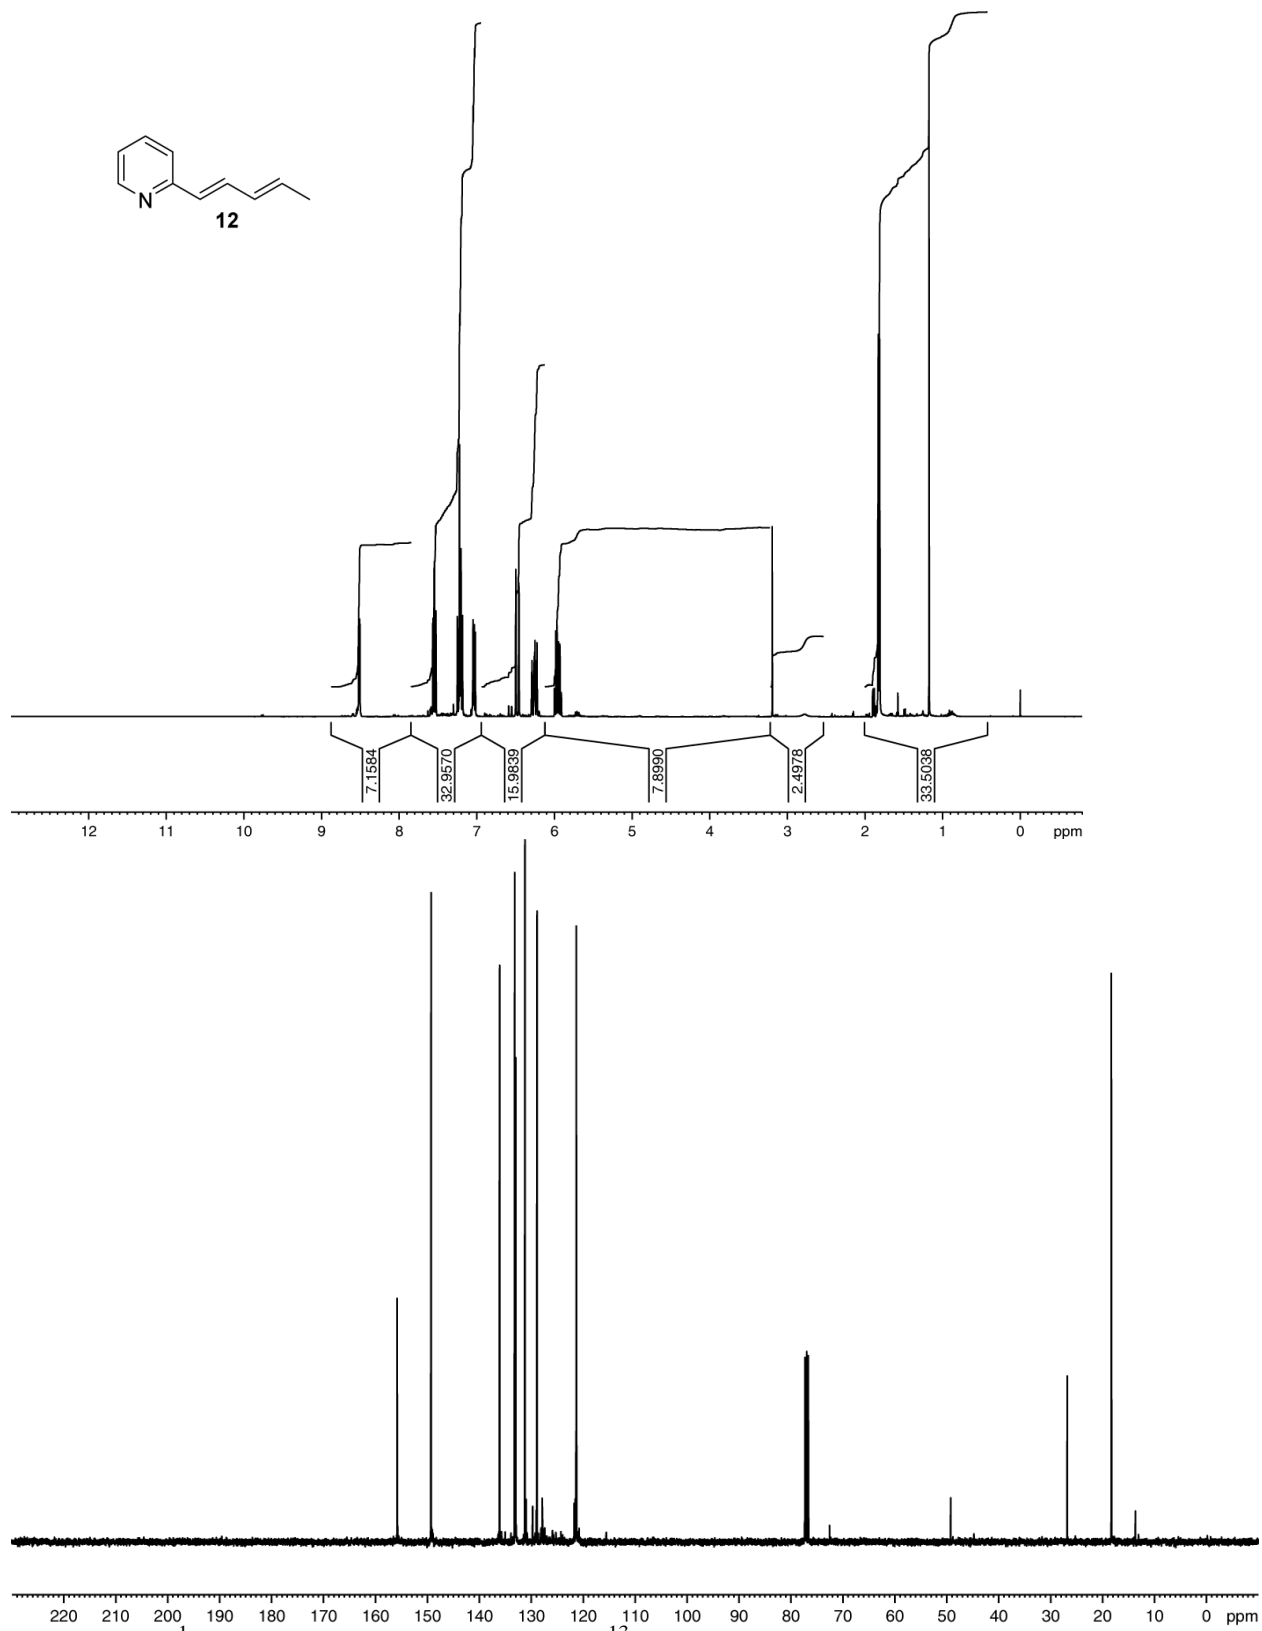

**Figure S12:**  $^1\text{H}$  NMR ( $\text{CDCl}_3$ , 400 MHz) and  $^{13}\text{C}$  NMR ( $\text{CDCl}_3$ , 100 MHz) spectrum of compound **12**.

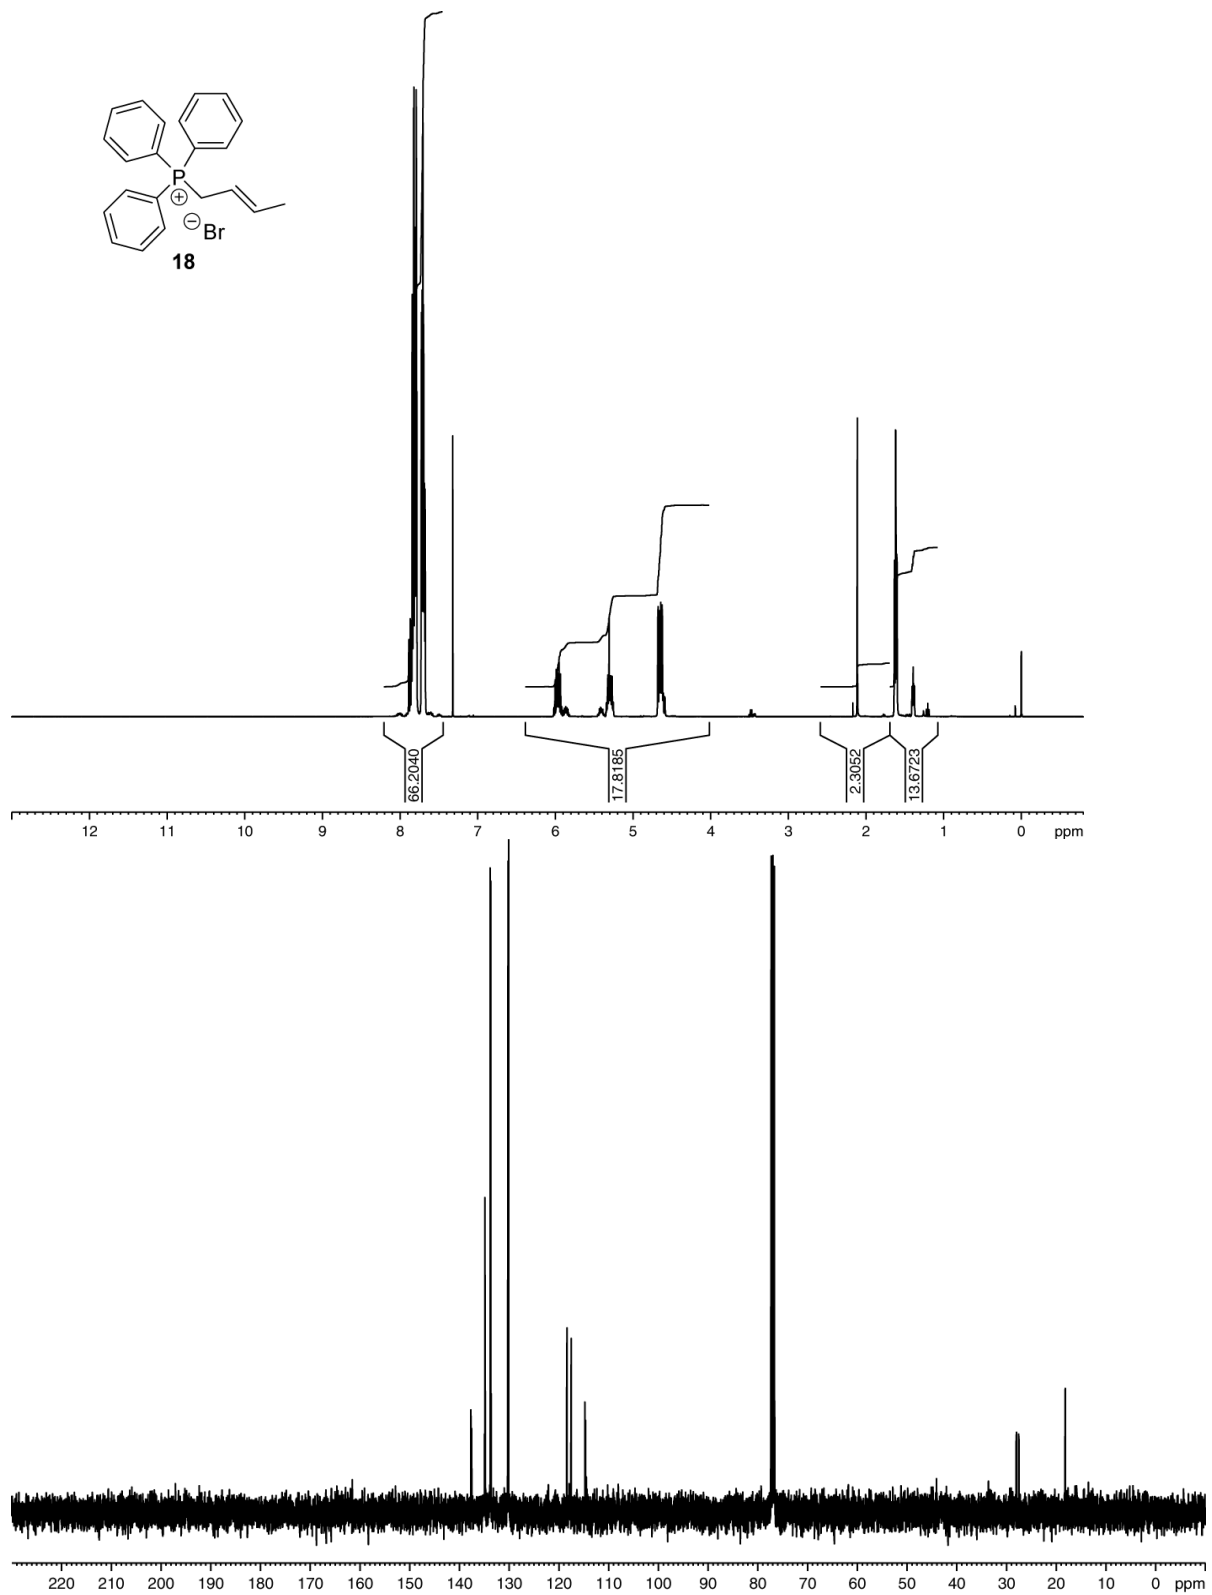

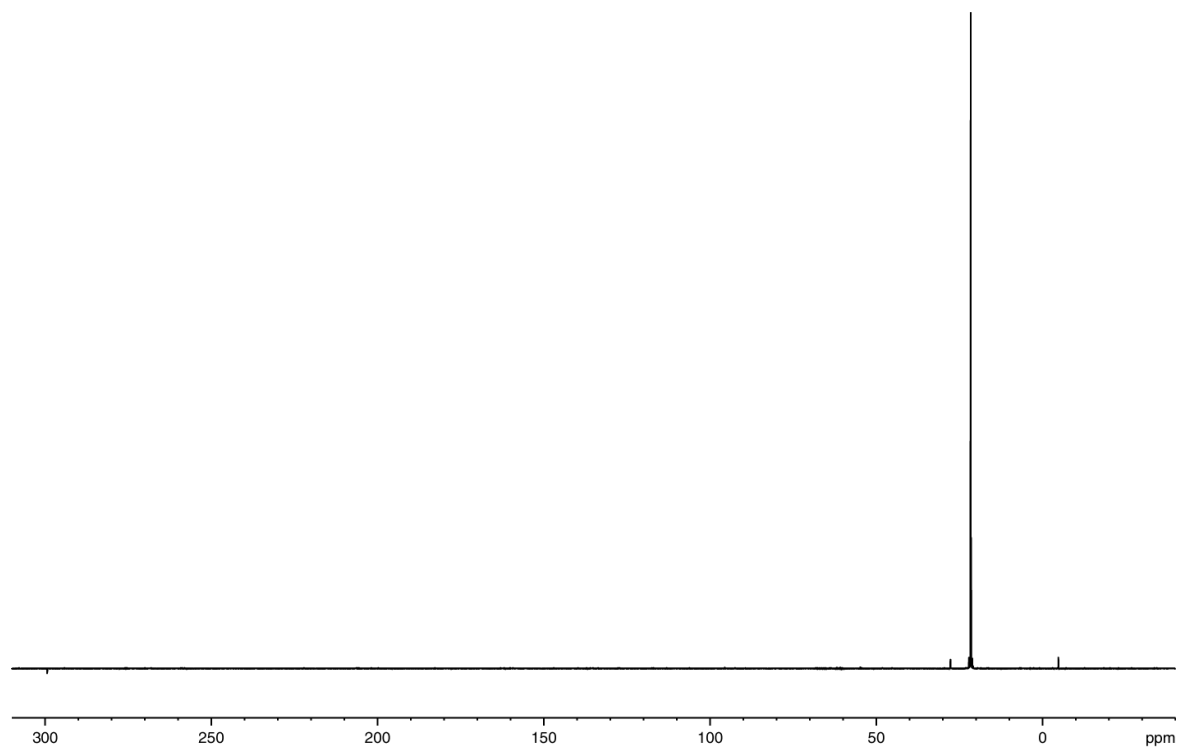

**Figure S13:**  $^1\text{H}$  NMR ( $\text{CDCl}_3$ , 400 MHz),  $^{13}\text{C}$  NMR ( $\text{CDCl}_3$ , 100 MHz) and  $^{31}\text{P}$  NMR spectrum of compound **18**.
